# Supplementary material for: BSR and Full-Length Transcriptome Approaches Identified Candidate Genes for High Seed Ratio in Camellia vietnamensis
Source: MDPI journal article supplement (doi:10.3390/cimb45010022), 2022-12-31
Supplement: s1 [file s1]

# Supplementary Material

## 1 Supplementary Figures and Tables

### 1.1 Supplementary Figures

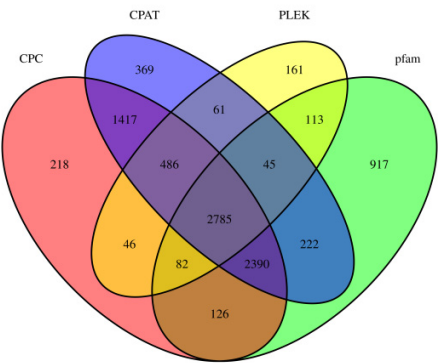

Supplementary Figure S1. Prediction results of lncRNA of the full-length transcript of *C. vietnamensis*

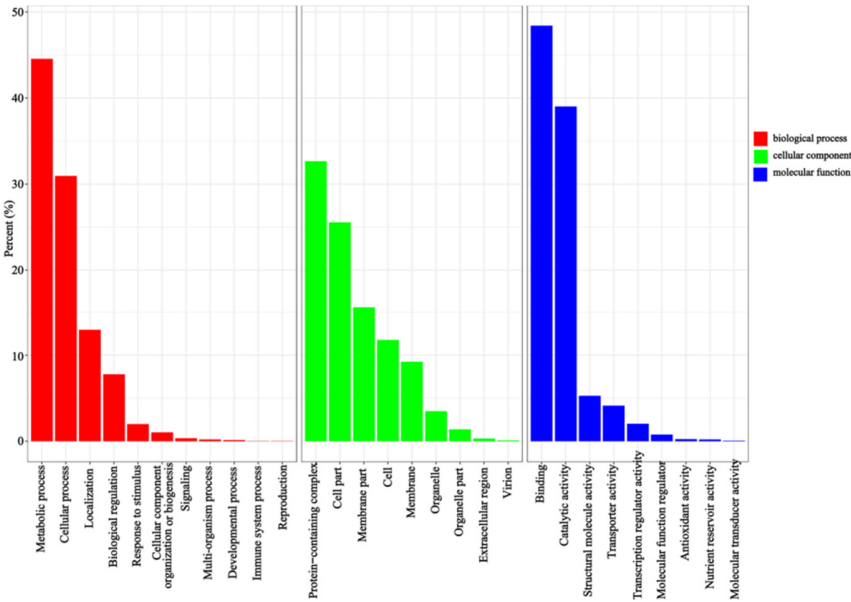

Supplementary Figure S2. GO annotation classification map of the full-length transcriptome sequence

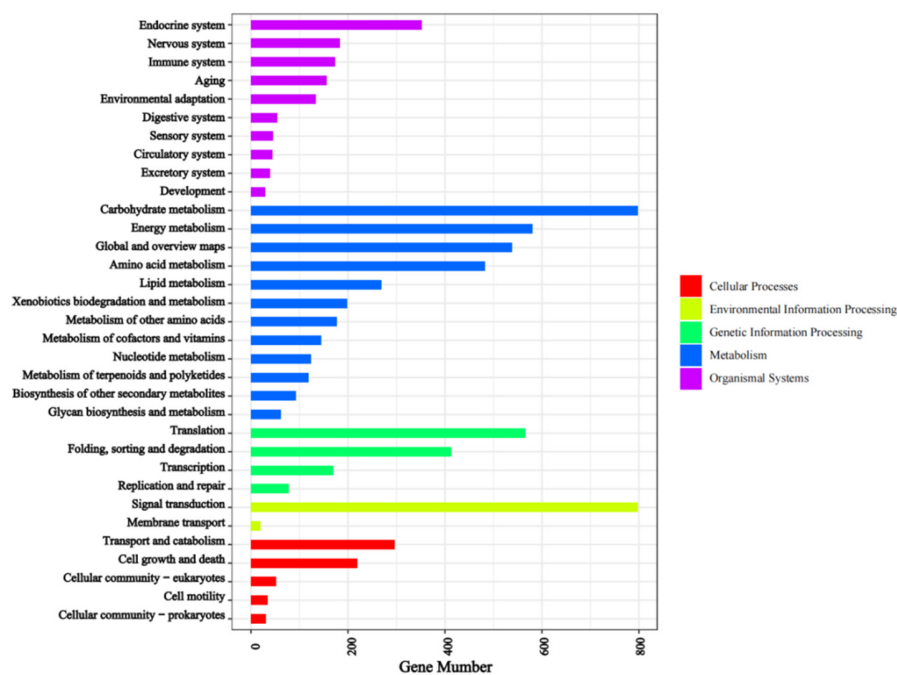

**Supplementary Figure S3. KEEG annotation classification map of the full-length transcriptome sequence**

**2.2 Supplementary Tables**

**Supplementary Table S1. Statistical results for non-redundant high quality full-length transcripts**

| Seq_ number | Total Length ( bp ) | <1kb | >1kb&< 2kb | >2kb& 3kb | >3kb | N50 | N90 | Mean | Media n | Max  | Min |
|-------------|---------------------|------|------------|-----------|------|-----|-----|------|---------|------|-----|
| 14152       | 12403692            | 9835 | 3935       | 350       | 32   | 997 | 515 | 876  | 770     | 4719 | 107 |
